# Supplementary material for: Catalytic production of hydrogen through aqueous-phase reforming over platinum/ordered mesoporous carbon catalysts
Source: Royal Society of Chemistry journal article supplement (doi:10.1039/c1gc15235a), 2011-01-01
Supplement: c1gc15235a.pdf [file c1gc15235a.pdf]

## Supporting Information

### Catalytic Production of Hydrogen through Aqueous-Phase Reforming over Platinum/Ordered Mesoporous Carbon Catalysts

Tae-Wan Kim,<sup>\*a</sup> Ho-Dong Kim,<sup>a,b</sup> Kwang-Eun Jeong,<sup>a</sup> Ho-Jeong Chae,<sup>a</sup> Soon-Yong Jeong,<sup>a</sup> Chang-Ha Lee,<sup>b</sup> Chul-Ung Kim<sup>\*a</sup>

<sup>a</sup> *Petroleum Displacement Research Center, Green Chemistry Research Division, Korea Research Institute of Chemical Technology, P.O. Box 107, Sinseongno 19, Yuseong, Daejeon 305-600, Republic of Korea.*

<sup>b</sup> *Department of Chemical and Biomolecular Engineering, Yonsei University, 134 Shinchon-dong, Seodaemun-gu, Seoul 120-749, Republic of Korea.*

\* Correspondence should be addressed to Dr. T.-W. Kim (E-mail: [twkim@kriect.re.kr](mailto:twkim@kriect.re.kr)) and Dr. C.-U. Kim (E-mail: [cukim@kriect.re.kr](mailto:cukim@kriect.re.kr))

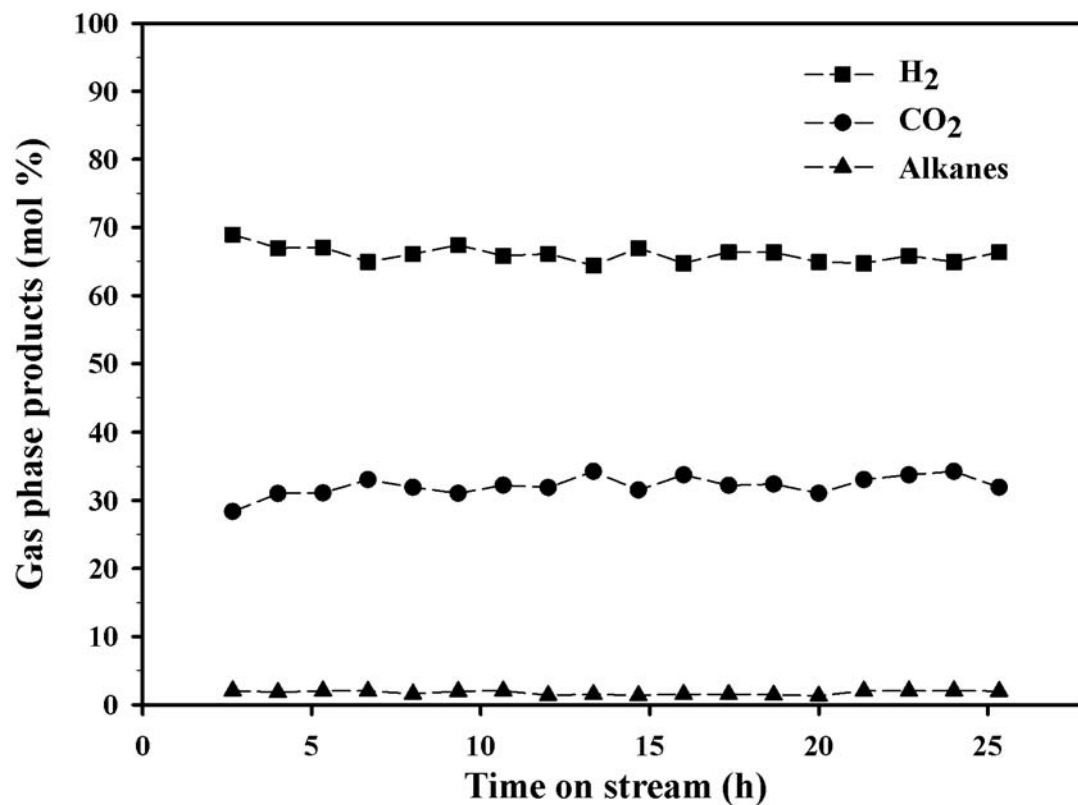

**Figure S1.** Rates of gas productions over 7% Pt/CMK-3 with time on stream at 250°C, 45 atm and WHSV of 2.0 h<sup>-1</sup> for APR of 10 wt% aqueous EG.

**Table S1.** EDX quantification of CMK-3

| Element | Atomic % |
|---------|----------|
| C       | 91.7     |
| O       | 8.1      |
| Si      | < 0.1    |
| F       | < 0.1    |
